# Supplementary material
Source: publisher figshare collection journal article supplement (https://acs.figshare.com/ndownloader/files/5170468)
Supplement: Supplementary file 1 [file 5170468]

  
data_tkc1 
  
_audit_creation_method            SHELXL-97 
_chemical_name_systematic 
; 
 ? 
; 
_chemical_name_common             ? 
_chemical_melting_point           ? 
_chemical_formula_moiety          ? 
_chemical_formula_sum 
 'C37 H27 F6 N3 O5' 
_chemical_formula_weight          707.62 
  
loop_ 
 _atom_type_symbol 
 _atom_type_description 
 _atom_type_scat_dispersion_real 
 _atom_type_scat_dispersion_imag 
 _atom_type_scat_source 
 'C'  'C'   0.0033   0.0016 
 'International Tables Vol C Tables 4.2.6.8 and 6.1.1.4' 
 'H'  'H'   0.0000   0.0000 
 'International Tables Vol C Tables 4.2.6.8 and 6.1.1.4' 
 'N'  'N'   0.0061   0.0033 
 'International Tables Vol C Tables 4.2.6.8 and 6.1.1.4' 
 'O'  'O'   0.0106   0.0060 
 'International Tables Vol C Tables 4.2.6.8 and 6.1.1.4' 
 'F'  'F'   0.0171   0.0103 
 'International Tables Vol C Tables 4.2.6.8 and 6.1.1.4' 
  
_symmetry_cell_setting            mnoclinic 
_symmetry_space_group_name_H-M    P2(1)/c 
  
loop_ 
 _symmetry_equiv_pos_as_xyz 
 'x, y, z' 
 '-x, y+1/2, -z+1/2' 
 '-x, -y, -z' 
 'x, -y-1/2, z-1/2' 
  
_cell_length_a                    11.0495(10) 
_cell_length_b                    17.7082(16) 
_cell_length_c                    34.093(3) 
_cell_angle_alpha                 90.00 
_cell_angle_beta                  94.478(2) 
_cell_angle_gamma                 90.00 
_cell_volume                      6650.6(10) 
_cell_formula_units_Z             8 
_cell_measurement_temperature     223(2) 
_cell_measurement_reflns_used     2541 
_cell_measurement_theta_min       2.2 
_cell_measurement_theta_max       22.5 
  
_exptl_crystal_description        multifaced 
_exptl_crystal_colour             blue 
_exptl_crystal_size_max           0.30 
_exptl_crystal_size_mid           0.10 
_exptl_crystal_size_min           0.08 
_exptl_crystal_density_meas       'not measured' 
_exptl_crystal_density_diffrn     1.413 
_exptl_crystal_density_method     'not measured' 
_exptl_crystal_F_000              2912 
_exptl_absorpt_coefficient_mu     0.117 
_exptl_absorpt_correction_type    'sadabs (Sheldrick, 2002)' 
_exptl_absorpt_correction_T_min   0.9657 
_exptl_absorpt_correction_T_max   0.9907 
_exptl_absorpt_process_details    ? 
  
_exptl_special_details 
; 
 ? 
; 
  
_diffrn_ambient_temperature       223(2) 
_diffrn_radiation_wavelength      0.71073 
_diffrn_radiation_type            MoK\a 
_diffrn_radiation_source          'fine-focus sealed tube' 
_diffrn_radiation_monochromator   graphite 
_diffrn_measurement_device_type   ? 
_diffrn_measurement_method        '\w scans' 
_diffrn_detector_area_resol_mean  ? 
_diffrn_standards_number          ? 
_diffrn_standards_interval_count  ? 
_diffrn_standards_interval_time   ? 
_diffrn_standards_decay_%         ? 
_diffrn_reflns_number             31050 
_diffrn_reflns_av_R_equivalents   0.1032 
_diffrn_reflns_av_sigmaI/netI     0.0982 
_diffrn_reflns_limit_h_min        -11 
_diffrn_reflns_limit_h_max        11 
_diffrn_reflns_limit_k_min        -19 
_diffrn_reflns_limit_k_max        15 
_diffrn_reflns_limit_l_min        -36 
_diffrn_reflns_limit_l_max        35 
_diffrn_reflns_theta_min          1.66 
_diffrn_reflns_theta_max          22.50 
_reflns_number_total              8693 
_reflns_number_gt                 4628 
_reflns_threshold_expression      >2sigma(I) 
  
_computing_data_collection        'Bruker AXS, SMART' 
_computing_cell_refinement        'Bruker AXS, SAINT' 
_computing_data_reduction         'Bruker AXS, SAINT' 
_computing_structure_solution     'SHELXS-97 (Sheldrick, 1990)' 
_computing_structure_refinement   'SHELXL-97 (Sheldrick, 1997)' 
_computing_molecular_graphics     'Bruker AXS, SHELXTL' 
_computing_publication_material   'Bruker AXS, SHELXTL' 
  
_refine_special_details 
; 
 Refinement of F^2^ against ALL reflections.  The weighted R-factor wR and 
 goodness of fit S are based on F^2^, conventional R-factors R are based 
 on F, with F set to zero for negative F^2^. The threshold expression of 
 F^2^ > 2sigma(F^2^) is used only for calculating R-factors(gt) etc. and is 
 not relevant to the choice of reflections for refinement.  R-factors based 
 on F^2^ are statistically about twice as large as those based on F, and R- 
 factors based on ALL data will be even larger. 
; 
  
_refine_ls_structure_factor_coef  Fsqd 
_refine_ls_matrix_type            full 
_refine_ls_weighting_scheme       calc 
_refine_ls_weighting_details 
 'calc w=1/[\s^2^(Fo^2^)+(0.1600P)^2^+0.0000P] where P=(Fo^2^+2Fc^2^)/3' 
_atom_sites_solution_primary      direct 
_atom_sites_solution_secondary    difmap 
_atom_sites_solution_hydrogens    geom 
_refine_ls_hydrogen_treatment     mixed 
_refine_ls_extinction_method      none 
_refine_ls_extinction_coef        ? 
_refine_ls_number_reflns          8693 
_refine_ls_number_parameters      879 
_refine_ls_number_restraints      592 
_refine_ls_R_factor_all           0.1696 
_refine_ls_R_factor_gt            0.1056 
_refine_ls_wR_factor_ref          0.3158 
_refine_ls_wR_factor_gt           0.2768 
_refine_ls_goodness_of_fit_ref    1.117 
_refine_ls_restrained_S_all       1.269 
_refine_ls_shift/su_max           0.001 
_refine_ls_shift/su_mean          0.000 
  
loop_ 
 _atom_site_label 
 _atom_site_type_symbol 
 _atom_site_fract_x 
 _atom_site_fract_y 
 _atom_site_fract_z 
 _atom_site_U_iso_or_equiv 
 _atom_site_adp_type 
 _atom_site_occupancy 
 _atom_site_symmetry_multiplicity 
 _atom_site_calc_flag 
 _atom_site_refinement_flags 
 _atom_site_disorder_assembly 
 _atom_site_disorder_group 
O1 O 0.0255(4) 0.4289(3) 0.89043(15) 0.0476(13) Uani 1 1 d . . . 
N1 N 0.1863(6) 0.4557(4) 0.8336(2) 0.0552(18) Uani 1 1 d . . . 
H1 H 0.1948 0.4361 0.8571 0.066 Uiso 1 1 calc R . . 
N2 N 0.2968(6) 0.3225(5) 0.8429(3) 0.080(3) Uani 1 1 d . . . 
H2 H 0.2762 0.3416 0.8649 0.096 Uiso 1 1 calc R . . 
N3 N 0.1368(6) 0.2814(4) 0.8980(2) 0.063(2) Uani 1 1 d . . . 
H3 H 0.1416 0.3208 0.8830 0.076 Uiso 1 1 calc R . . 
C1 C 0.0256(6) 0.5417(4) 0.8493(2) 0.0432(19) Uani 1 1 d . . . 
C2 C 0.1099(6) 0.5132(4) 0.8228(2) 0.049(2) Uani 1 1 d . . . 
C3 C 0.1313(7) 0.5312(4) 0.7843(2) 0.050(2) Uani 1 1 d . . . 
H3 H 0.0947 0.5714 0.7698 0.060 Uiso 1 1 calc R . . 
C4 C 0.2130(7) 0.4822(4) 0.7707(3) 0.053(2) Uani 1 1 d . . . 
H4 H 0.2407 0.4812 0.7453 0.063 Uiso 1 1 calc R . . 
C5 C 0.2482(7) 0.4326(5) 0.8024(3) 0.055(2) Uani 1 1 d . . . 
C6 C 0.3092(7) 0.3645(5) 0.8040(3) 0.064(2) Uani 1 1 d . . . 
C7 C 0.3494(9) 0.3122(7) 0.7815(4) 0.096(4) Uani 1 1 d . . . 
H7 H 0.3682 0.3206 0.7554 0.116 Uiso 1 1 calc R . . 
C8 C 0.3621(8) 0.2375(6) 0.8018(4) 0.077(3) Uani 1 1 d . . . 
H8 H 0.3908 0.1917 0.7920 0.093 Uiso 1 1 calc R . . 
C9 C 0.3240(9) 0.2512(8) 0.8360(4) 0.093(4) Uani 1 1 d . . . 
C10 C 0.2859(10) 0.2011(6) 0.8637(4) 0.094(4) Uani 1 1 d . . . 
H10 H 0.3186 0.1521 0.8632 0.113 Uiso 1 1 calc R . . 
C11 C 0.2006(9) 0.2153(5) 0.8938(3) 0.064(2) Uani 1 1 d . . . 
C12 C 0.1631(8) 0.1669(5) 0.9232(3) 0.063(2) Uani 1 1 d . . . 
H12 H 0.1901 0.1171 0.9275 0.08(3) Uiso 1 1 calc R . . 
C13 C 0.0810(8) 0.2038(4) 0.9447(2) 0.061(2) Uani 1 1 d . . . 
H13 H 0.0424 0.1839 0.9661 0.073 Uiso 1 1 calc R . . 
C14 C 0.0655(8) 0.2771(5) 0.9287(3) 0.059(2) Uani 1 1 d . . . 
C15 C -0.0041(7) 0.3370(5) 0.9424(2) 0.056(2) Uani 1 1 d . . . 
C16 C -0.0209(7) 0.4085(5) 0.9257(2) 0.050(2) Uani 1 1 d . . . 
C17 C -0.0800(7) 0.4728(4) 0.9395(2) 0.048(2) Uani 1 1 d . . . 
H17 H -0.1185 0.4758 0.9630 0.057 Uiso 1 1 calc R . . 
C18 C -0.0721(7) 0.5295(4) 0.9131(2) 0.048(2) Uani 1 1 d . . . 
H18 H -0.1049 0.5782 0.9152 0.057 Uiso 1 1 calc R . . 
C19 C -0.0066(6) 0.5032(4) 0.8821(2) 0.044(2) Uani 1 1 d . . . 
O2 O 0.2217(4) 0.6986(3) 0.61458(15) 0.0480(13) Uani 1 1 d . A . 
N4 N 0.1130(6) 0.7395(4) 0.68414(19) 0.0515(17) Uani 1 1 d . A . 
H4A H 0.1340 0.6965 0.6744 0.062 Uiso 1 1 calc R . . 
N6 N 0.0925(6) 0.5598(4) 0.6192(2) 0.0618(19) Uani 1 1 d . A . 
H6 H 0.1247 0.5914 0.6366 0.074 Uiso 1 1 calc R . . 
C20 C 0.2616(7) 0.8152(4) 0.6517(2) 0.0457(19) Uani 1 1 d . . . 
C21 C 0.1661(7) 0.8069(5) 0.6762(2) 0.051(2) Uani 1 1 d . . . 
C22 C 0.1036(8) 0.8619(5) 0.6985(3) 0.064(2) Uani 1 1 d . . . 
H22 H 0.1186 0.9141 0.6993 0.077 Uiso 1 1 calc R . . 
C23 C 0.0176(8) 0.8238(6) 0.7184(3) 0.073(3) Uani 1 1 d . A . 
H23 H -0.0356 0.8458 0.7353 0.087 Uiso 1 1 calc R . . 
C24 C 0.0234(8) 0.7474(6) 0.7091(3) 0.066(3) Uani 1 1 d D . . 
C25 C -0.0569(15) 0.7023(8) 0.7250(6) 0.068(5) Uani 0.50 1 d PD A 1 
H25 H -0.0996 0.7185 0.7463 0.082 Uiso 0.50 1 calc PR A 1 
N5 N -0.0185(16) 0.6169(10) 0.6739(5) 0.110(13) Uiso 0.50 1 d PG A 1 
H5A H 0.0291 0.6473 0.6623 0.132 Uiso 0.50 1 calc PR A 1 
C26 C -0.0745(15) 0.6322(6) 0.7092(5) 0.077(6) Uiso 0.50 1 d PGD A 1 
C27 C -0.1445(12) 0.5680(7) 0.7181(3) 0.041(7) Uiso 0.50 1 d PG A 1 
H27B H -0.1911 0.5628 0.7398 0.049 Uiso 0.50 1 calc PR A 1 
C28 C -0.1318(16) 0.5132(7) 0.6883(5) 0.118(9) Uiso 0.50 1 d PG A 1 
H28A H -0.1685 0.4652 0.6869 0.142 Uiso 0.50 1 calc PR A 1 
C29 C -0.0540(17) 0.5434(10) 0.6610(4) 0.077(7) Uiso 0.50 1 d PG A 1 
N5A N -0.0286(11) 0.6200(6) 0.6780(3) 0.033(6) Uiso 0.50 1 d PG A 2 
H5A H 0.0166 0.6286 0.6587 0.040 Uiso 0.50 1 calc PR A 2 
C25A C -0.0506(12) 0.6713(5) 0.7087(4) 0.043(5) Uiso 0.50 1 d PG A 2 
C26A C -0.1290(13) 0.6354(8) 0.7340(3) 0.071(5) Uiso 0.50 1 d PG A 2 
H26A H -0.1582 0.6565 0.7567 0.085 Uiso 0.50 1 calc PR A 2 
C27A C -0.1556(15) 0.5620(8) 0.7189(5) 0.131(19) Uiso 0.50 1 d PG A 2 
H27A H -0.2054 0.5259 0.7300 0.157 Uiso 0.50 1 calc PR A 2 
C28A C -0.0935(14) 0.5525(6) 0.6843(4) 0.073(5) Uiso 0.50 1 d PGD A 2 
C29A C -0.0772(17) 0.4995(12) 0.6555(4) 0.077(6) Uani 0.50 1 d PD A 2 
H29 H -0.1182 0.4531 0.6562 0.093 Uiso 0.50 1 calc PR A 2 
C30 C -0.0026(9) 0.5125(7) 0.6255(3) 0.082(3) Uani 1 1 d D . . 
C31 C -0.0234(9) 0.4700(6) 0.5908(3) 0.078(3) Uani 1 1 d . A . 
H31 H -0.0822 0.4319 0.5866 0.093 Uiso 1 1 calc R . . 
C32 C 0.0552(8) 0.4927(5) 0.5644(3) 0.067(3) Uani 1 1 d . . . 
H31 H 0.0597 0.4735 0.5388 0.081 Uiso 1 1 calc R A . 
C33 C 0.1300(8) 0.5511(5) 0.5825(3) 0.057(2) Uani 1 1 d . A . 
C34 C 0.2226(7) 0.5941(4) 0.5673(2) 0.051(2) Uani 1 1 d . . . 
C35 C 0.2741(7) 0.6597(4) 0.5850(2) 0.046(2) Uani 1 1 d . A . 
C36 C 0.3805(7) 0.6982(4) 0.5768(2) 0.051(2) Uani 1 1 d . . . 
H36 H 0.4337 0.6843 0.5578 0.061 Uiso 1 1 calc R A . 
C37 C 0.3927(7) 0.7587(5) 0.6010(2) 0.050(2) Uani 1 1 d . A . 
H37 H 0.4569 0.7937 0.6019 0.059 Uiso 1 1 calc R . . 
C38 C 0.2942(7) 0.7610(4) 0.6245(2) 0.0439(19) Uani 1 1 d . . . 
C1A C -0.0341(6) 0.6159(4) 0.8393(2) 0.047(2) Uani 1 1 d . . . 
C2A C -0.1585(7) 0.6250(5) 0.8389(2) 0.058(2) Uani 1 1 d . . . 
H2A H -0.2074 0.5829 0.8434 0.069 Uiso 1 1 calc R . . 
C3A C -0.2126(8) 0.6947(5) 0.8320(3) 0.065(2) Uani 1 1 d . . . 
H3A H -0.2975 0.6994 0.8307 0.078 Uiso 1 1 calc R . . 
C4A C -0.1413(8) 0.7573(5) 0.8269(2) 0.060(2) Uani 1 1 d . . . 
C5A C -0.0182(7) 0.7481(5) 0.8260(3) 0.061(2) Uani 1 1 d . . . 
H5A H 0.0310 0.7901 0.8215 0.073 Uiso 1 1 calc R . . 
C6A C 0.0338(7) 0.6780(5) 0.8316(2) 0.058(2) Uani 1 1 d . . . 
H6A H 0.1179 0.6726 0.8301 0.069 Uiso 1 1 calc R . . 
C7A C -0.1978(9) 0.8361(5) 0.8228(3) 0.083(3) Uani 1 1 d . . . 
H7A1 H -0.2854 0.8321 0.8226 0.124 Uiso 1 1 calc R . . 
H7A2 H -0.1766 0.8590 0.7984 0.124 Uiso 1 1 calc R . . 
H7A3 H -0.1673 0.8672 0.8448 0.124 Uiso 1 1 calc R . . 
C1B C -0.0673(8) 0.3228(4) 0.9783(3) 0.058(2) Uani 1 1 d . . . 
C2B C -0.1939(9) 0.3302(5) 0.9784(3) 0.065(3) Uani 1 1 d . . . 
H2B H -0.2391 0.3431 0.9548 0.078 Uiso 1 1 calc R . . 
C3B C -0.2539(9) 0.3194(5) 1.0118(3) 0.073(3) Uani 1 1 d . . . 
H3B H -0.3391 0.3219 1.0104 0.087 Uiso 1 1 calc R . . 
C4B C -0.1896(12) 0.3047(5) 1.0474(3) 0.079(3) Uani 1 1 d . . . 
C5B C -0.0643(12) 0.2964(6) 1.0478(3) 0.083(3) Uani 1 1 d . . . 
H5B H -0.0194 0.2833 1.0714 0.100 Uiso 1 1 calc R . . 
C6B C -0.0059(9) 0.3069(5) 1.0148(3) 0.073(3) Uani 1 1 d . . . 
H6B H 0.0793 0.3033 1.0164 0.087 Uiso 1 1 calc R . . 
C7B C -0.2534(11) 0.2970(7) 1.0844(3) 0.113(4) Uani 1 1 d . . . 
H7B1 H -0.2293 0.2500 1.0974 0.170 Uiso 1 1 calc R . . 
H7B2 H -0.3405 0.2969 1.0779 0.170 Uiso 1 1 calc R . . 
H7B3 H -0.2317 0.3390 1.1017 0.170 Uiso 1 1 calc R . . 
C1C C 0.3301(7) 0.8876(4) 0.6544(2) 0.046(2) Uani 1 1 d . . . 
C2C C 0.3754(8) 0.9170(5) 0.6901(2) 0.059(2) Uani 1 1 d . A . 
H2C H 0.3604 0.8913 0.7133 0.070 Uiso 1 1 calc R . . 
C3C C 0.4419(8) 0.9828(5) 0.6926(3) 0.061(2) Uani 1 1 d . . . 
H3C H 0.4706 1.0011 0.7175 0.074 Uiso 1 1 calc R A . 
C4C C 0.4669(7) 1.0219(4) 0.6599(3) 0.055(2) Uani 1 1 d . A . 
C5C C 0.4223(8) 0.9952(5) 0.6236(3) 0.061(2) Uani 1 1 d . . . 
H5C H 0.4379 1.0217 0.6007 0.073 Uiso 1 1 calc R A . 
C6C C 0.3545(7) 0.9292(5) 0.6209(2) 0.056(2) Uani 1 1 d . A . 
H6C H 0.3242 0.9119 0.5960 0.067 Uiso 1 1 calc R . . 
C7C C 0.5443(9) 1.0926(5) 0.6624(3) 0.080(3) Uani 1 1 d . . . 
H7C1 H 0.4952 1.1358 0.6536 0.120 Uiso 1 1 calc R A . 
H7C2 H 0.6110 1.0870 0.6457 0.120 Uiso 1 1 calc R . . 
H7C3 H 0.5763 1.1004 0.6894 0.120 Uiso 1 1 calc R . . 
C1D C 0.2664(7) 0.5692(5) 0.5295(2) 0.052(2) Uani 1 1 d . A . 
C2D C 0.2689(8) 0.6198(5) 0.4978(3) 0.065(2) Uani 1 1 d . . . 
H2D H 0.2434 0.6701 0.5004 0.078 Uiso 1 1 calc R A . 
C3D C 0.3093(9) 0.5948(6) 0.4630(3) 0.072(3) Uani 1 1 d . A . 
H3D H 0.3085 0.6287 0.4418 0.087 Uiso 1 1 calc R . . 
C4D C 0.3504(8) 0.5232(6) 0.4578(3) 0.068(3) Uani 1 1 d . . . 
C5D C 0.3475(8) 0.4739(5) 0.4886(3) 0.071(3) Uani 1 1 d . A . 
H5D H 0.3734 0.4238 0.4855 0.085 Uiso 1 1 calc R . . 
C6D C 0.3068(8) 0.4965(5) 0.5246(3) 0.062(2) Uani 1 1 d . . . 
H6D H 0.3070 0.4619 0.5455 0.075 Uiso 1 1 calc R A . 
C7D C 0.3962(9) 0.4985(6) 0.4191(3) 0.088(3) Uani 1 1 d . A . 
H7D1 H 0.4114 0.4445 0.4198 0.133 Uiso 1 1 calc R . . 
H7D2 H 0.4710 0.5250 0.4150 0.133 Uiso 1 1 calc R . . 
H7D3 H 0.3357 0.5100 0.3978 0.133 Uiso 1 1 calc R . . 
C1S C 0.3158(8) 0.4706(7) 0.9670(4) 0.118(5) Uani 1 1 d D . . 
F1 F 0.2057(8) 0.4949(6) 0.9661(3) 0.122(4) Uiso 0.70 1 d PD B . 
F2 F 0.3530(10) 0.4602(6) 1.0045(3) 0.139(4) Uiso 0.70 1 d PD B . 
F3 F 0.3894(8) 0.5316(6) 0.9583(3) 0.118(3) Uiso 0.70 1 d PD B . 
F1A F 0.2280(13) 0.5188(9) 0.9488(5) 0.071(5) Uiso 0.30 1 d PD B 2 
F2A F 0.2453(19) 0.4384(12) 0.9945(6) 0.129(8) Uiso 0.30 1 d PD B 2 
F3A F 0.3995(14) 0.5058(12) 0.9843(7) 0.115(7) Uiso 0.30 1 d PD B 2 
C2S C 0.3421(9) 0.4063(6) 0.9399(3) 0.074(3) Uani 1 1 d D B . 
O1S O 0.3088(6) 0.4189(3) 0.9057(2) 0.0754(18) Uani 1 1 d D . . 
O2S O 0.3908(8) 0.3492(6) 0.9535(2) 0.130(3) Uani 1 1 d D . . 
C3S C 0.4218(6) 0.5323(5) 0.6812(2) 0.060(2) Uani 1 1 d D . . 
F4 F 0.5332(7) 0.5462(5) 0.6729(3) 0.095(3) Uiso 0.70 1 d PD C . 
F5 F 0.4306(7) 0.4708(4) 0.7056(2) 0.074(2) Uiso 0.70 1 d PD C . 
F6 F 0.3672(7) 0.5007(4) 0.6482(2) 0.080(2) Uiso 0.70 1 d PD C . 
F4A F 0.4267(19) 0.5467(12) 0.6433(4) 0.121(7) Uiso 0.30 1 d PD C 3 
F5A F 0.5425(11) 0.5326(9) 0.6949(5) 0.066(5) Uiso 0.30 1 d PD C 3 
F6A F 0.3807(16) 0.4662(9) 0.6867(6) 0.099(7) Uiso 0.30 1 d PD C 3 
C4S C 0.3533(7) 0.5950(4) 0.6993(2) 0.047(2) Uani 1 1 d D C . 
O3S O 0.2487(5) 0.6046(3) 0.68608(16) 0.0631(16) Uani 1 1 d D . . 
O4S O 0.4131(5) 0.6286(3) 0.7264(2) 0.0765(18) Uani 1 1 d D . . 
C5S C 0.3489(8) 0.8266(5) 0.8103(3) 0.073(3) Uani 1 1 d D . . 
F7 F 0.2509(9) 0.8134(6) 0.8290(3) 0.104(3) Uiso 0.65 1 d PD D . 
F8 F 0.3284(8) 0.8916(5) 0.7907(2) 0.090(3) Uiso 0.65 1 d PD D . 
F9 F 0.4353(9) 0.8468(7) 0.8391(3) 0.124(4) Uiso 0.65 1 d PD D . 
F7A F 0.2946(16) 0.7898(9) 0.8398(4) 0.091(6) Uiso 0.35 1 d PD D 4 
F8A F 0.4196(16) 0.8762(11) 0.8296(6) 0.112(8) Uiso 0.35 1 d PD D 4 
F9A F 0.2563(15) 0.8662(10) 0.7918(5) 0.112(6) Uiso 0.35 1 d PD D 4 
C6S C 0.3995(9) 0.7679(5) 0.7847(3) 0.070(3) Uani 1 1 d D D . 
O5S O 0.5062(7) 0.7599(5) 0.7879(3) 0.121(3) Uani 1 1 d D . . 
O6S O 0.3171(7) 0.7314(4) 0.7671(2) 0.100(2) Uani 1 1 d D . . 
H6SA H 0.3468 0.6979 0.7538 0.151 Uiso 1 1 calc R D . 
C7S C 0.3581(10) 0.2216(6) 1.0711(4) 0.124(5) Uani 1 1 d D . . 
F10 F 0.4313(12) 0.1630(7) 1.0789(4) 0.151(5) Uiso 0.65 1 d PD E . 
F11 F 0.2449(10) 0.1962(8) 1.0717(4) 0.147(4) Uiso 0.65 1 d PD E . 
F12 F 0.3785(15) 0.2738(7) 1.0979(4) 0.168(6) Uiso 0.65 1 d PD E . 
F10A F 0.2512(16) 0.2551(14) 1.0805(7) 0.166(10) Uiso 0.35 1 d PD E 5 
F11A F 0.346(2) 0.1513(8) 1.0853(7) 0.170(10) Uiso 0.35 1 d PD E 5 
F12A F 0.4371(16) 0.2536(10) 1.0998(5) 0.102(6) Uiso 0.35 1 d PD E 5 
C8S C 0.3825(15) 0.2472(10) 1.0313(5) 0.137(5) Uiso 1 1 d D E . 
O7S O 0.3665(14) 0.3111(10) 1.0240(5) 0.251(7) Uiso 1 1 d D . . 
H7SA H 0.3763 0.3186 1.0005 0.377 Uiso 1 1 calc R E . 
O8S O 0.4410(15) 0.2104(9) 1.0096(5) 0.239(6) Uiso 1 1 d D . . 
  
loop_ 
 _atom_site_aniso_label 
 _atom_site_aniso_U_11 
 _atom_site_aniso_U_22 
 _atom_site_aniso_U_33 
 _atom_site_aniso_U_23 
 _atom_site_aniso_U_13 
 _atom_site_aniso_U_12 
O1 0.046(3) 0.040(3) 0.056(3) 0.000(3) 0.006(3) 0.003(3) 
N1 0.046(4) 0.054(4) 0.068(5) 0.010(4) 0.017(4) 0.005(4) 
N2 0.049(5) 0.076(6) 0.114(7) -0.043(6) -0.006(4) 0.028(4) 
N3 0.063(5) 0.045(4) 0.082(6) 0.012(4) 0.002(4) 0.003(4) 
C1 0.032(4) 0.038(4) 0.059(5) 0.002(4) 0.000(4) 0.000(4) 
C2 0.030(4) 0.047(5) 0.071(6) 0.000(4) 0.008(4) 0.010(4) 
C3 0.043(5) 0.049(5) 0.059(6) 0.015(4) 0.010(4) 0.007(4) 
C4 0.045(5) 0.047(5) 0.069(6) 0.012(5) 0.022(4) -0.003(4) 
C5 0.039(5) 0.048(5) 0.080(6) -0.010(5) 0.021(4) -0.003(4) 
C6 0.043(5) 0.056(6) 0.094(8) -0.013(6) 0.015(5) 0.000(5) 
C7 0.058(7) 0.115(10) 0.117(10) -0.017(8) 0.014(6) 0.000(7) 
C8 0.053(6) 0.064(7) 0.115(9) -0.038(7) 0.003(6) 0.014(5) 
C9 0.044(6) 0.116(11) 0.116(10) -0.058(9) -0.021(6) 0.019(7) 
C10 0.069(7) 0.094(8) 0.114(9) 0.054(8) -0.027(7) -0.028(6) 
C11 0.068(6) 0.049(6) 0.073(7) 0.002(5) -0.001(5) 0.008(5) 
C12 0.091(7) 0.033(5) 0.065(6) 0.013(4) 0.007(5) 0.008(5) 
C13 0.084(7) 0.042(5) 0.057(5) 0.008(4) 0.004(5) 0.006(5) 
C14 0.059(6) 0.047(6) 0.068(6) 0.002(5) -0.004(5) 0.004(5) 
C15 0.056(5) 0.054(6) 0.055(5) 0.012(5) -0.014(4) -0.014(5) 
C16 0.051(5) 0.056(5) 0.042(5) 0.005(4) 0.000(4) -0.006(4) 
C17 0.049(5) 0.046(5) 0.050(5) -0.013(4) 0.012(4) 0.005(4) 
C18 0.049(5) 0.034(4) 0.059(5) -0.003(4) 0.008(4) 0.000(4) 
C19 0.032(4) 0.032(4) 0.067(6) 0.000(4) 0.002(4) 0.005(4) 
O2 0.041(3) 0.045(3) 0.058(3) -0.009(3) 0.001(3) -0.004(3) 
N4 0.041(4) 0.050(4) 0.064(5) -0.003(3) 0.004(3) 0.001(3) 
N6 0.057(5) 0.065(5) 0.063(5) -0.015(4) -0.002(4) -0.002(4) 
C20 0.037(4) 0.050(5) 0.050(5) 0.003(4) -0.001(4) 0.000(4) 
C21 0.043(5) 0.053(5) 0.056(5) -0.004(4) -0.007(4) 0.008(4) 
C22 0.066(6) 0.057(6) 0.068(6) -0.009(5) 0.000(5) 0.023(5) 
C23 0.051(6) 0.094(8) 0.075(7) 0.001(6) 0.015(5) 0.031(6) 
C24 0.038(5) 0.088(8) 0.071(6) 0.014(6) 0.003(5) 0.021(5) 
C25 0.049(11) 0.090(15) 0.066(13) -0.005(12) 0.011(10) 0.010(11) 
C29A 0.081(15) 0.066(14) 0.083(15) -0.002(11) -0.010(13) -0.002(12) 
C30 0.053(6) 0.110(9) 0.083(8) 0.013(7) 0.009(6) 0.005(6) 
C31 0.062(6) 0.081(7) 0.089(8) 0.005(6) -0.004(6) -0.020(5) 
C32 0.073(6) 0.064(6) 0.063(6) -0.019(5) -0.007(5) -0.004(5) 
C33 0.053(5) 0.062(6) 0.054(6) -0.015(5) -0.011(5) 0.007(5) 
C34 0.049(5) 0.048(5) 0.055(5) -0.009(4) -0.005(4) -0.005(4) 
C35 0.049(5) 0.047(5) 0.043(5) -0.006(4) 0.002(4) 0.005(4) 
C36 0.048(5) 0.048(5) 0.056(5) -0.009(4) 0.001(4) 0.006(4) 
C37 0.039(5) 0.055(5) 0.054(5) 0.000(4) 0.001(4) 0.004(4) 
C38 0.040(5) 0.041(5) 0.049(5) -0.001(4) -0.009(4) 0.003(4) 
C1A 0.035(4) 0.050(5) 0.055(5) -0.003(4) 0.005(4) -0.005(4) 
C2A 0.038(5) 0.056(6) 0.080(6) 0.000(4) 0.010(4) -0.003(4) 
C3A 0.040(5) 0.058(6) 0.096(7) 0.009(5) 0.009(5) 0.010(5) 
C4A 0.068(6) 0.053(6) 0.060(6) 0.000(4) 0.006(5) 0.011(5) 
C5A 0.042(5) 0.047(5) 0.093(7) 0.006(5) -0.006(5) -0.003(4) 
C6A 0.036(5) 0.056(6) 0.081(6) 0.002(5) 0.006(4) 0.003(5) 
C7A 0.075(7) 0.061(6) 0.112(8) 0.005(6) 0.003(6) 0.024(5) 
C1B 0.070(6) 0.041(5) 0.062(6) -0.001(4) -0.008(5) -0.005(4) 
C2B 0.083(7) 0.048(5) 0.062(6) 0.015(4) -0.010(5) -0.016(5) 
C3B 0.074(6) 0.076(7) 0.068(7) 0.009(5) 0.004(6) -0.023(5) 
C4B 0.118(10) 0.072(7) 0.048(6) -0.007(5) 0.014(6) -0.034(7) 
C5B 0.108(9) 0.089(8) 0.050(7) 0.002(5) -0.014(6) -0.015(7) 
C6B 0.071(6) 0.082(7) 0.062(7) 0.001(5) -0.010(6) 0.003(5) 
C7B 0.134(11) 0.135(11) 0.072(8) -0.004(7) 0.015(7) -0.047(8) 
C1C 0.043(5) 0.041(5) 0.054(5) -0.003(4) -0.004(4) 0.007(4) 
C2C 0.066(6) 0.054(6) 0.055(6) -0.004(4) 0.001(4) 0.010(5) 
C3C 0.062(6) 0.053(6) 0.067(6) -0.011(5) -0.008(5) 0.001(5) 
C4C 0.047(5) 0.041(5) 0.076(7) -0.007(5) -0.004(5) 0.008(4) 
C5C 0.060(6) 0.049(5) 0.072(6) 0.002(5) 0.001(5) 0.004(5) 
C6C 0.057(5) 0.053(5) 0.056(5) -0.009(4) -0.005(4) 0.008(5) 
C7C 0.074(7) 0.053(6) 0.109(8) -0.001(5) -0.011(6) -0.011(5) 
C1D 0.052(5) 0.044(5) 0.058(6) -0.013(4) -0.002(4) -0.007(4) 
C2D 0.088(7) 0.049(5) 0.058(6) -0.012(5) 0.008(5) -0.003(5) 
C3D 0.086(7) 0.071(7) 0.060(6) -0.016(5) 0.001(5) -0.015(6) 
C4D 0.056(6) 0.075(7) 0.071(7) -0.026(6) 0.002(5) -0.013(5) 
C5D 0.071(6) 0.052(6) 0.090(8) -0.016(6) 0.005(6) -0.001(5) 
C6D 0.065(6) 0.058(6) 0.063(6) -0.010(5) 0.004(5) 0.005(5) 
C7D 0.081(7) 0.110(8) 0.075(7) -0.038(6) 0.011(6) -0.010(6) 
C1S 0.053(7) 0.137(12) 0.158(13) 0.019(10) -0.022(8) 0.006(8) 
C2S 0.059(6) 0.087(8) 0.076(8) -0.029(7) 0.011(6) 0.020(6) 
O1S 0.074(4) 0.079(4) 0.071(4) -0.012(4) -0.009(4) -0.008(3) 
O2S 0.147(8) 0.155(8) 0.087(6) 0.011(5) 0.016(5) 0.080(7) 
C3S 0.042(5) 0.087(7) 0.052(5) 0.013(5) 0.010(4) -0.009(5) 
C4S 0.052(6) 0.041(5) 0.051(5) 0.002(4) 0.015(5) 0.003(4) 
O3S 0.046(4) 0.071(4) 0.069(4) -0.002(3) -0.010(3) 0.007(3) 
O4S 0.057(4) 0.075(4) 0.095(5) -0.022(4) -0.006(4) -0.001(3) 
C5S 0.067(6) 0.082(7) 0.070(6) 0.032(6) 0.000(5) -0.022(6) 
C6S 0.063(7) 0.047(6) 0.099(8) 0.008(5) -0.004(6) 0.011(5) 
O5S 0.067(5) 0.116(7) 0.179(9) -0.009(6) 0.007(5) -0.002(5) 
O6S 0.089(5) 0.090(5) 0.116(6) -0.019(4) -0.034(5) 0.017(4) 
C7S 0.111(11) 0.092(9) 0.167(14) -0.044(9) -0.008(10) 0.007(8) 
  
_geom_special_details 
; 
 All esds (except the esd in the dihedral angle between two l.s. planes) 
 are estimated using the full covariance matrix.  The cell esds are taken 
 into account individually in the estimation of esds in distances, angles 
 and torsion angles; correlations between esds in cell parameters are only 
 used when they are defined by crystal symmetry.  An approximate (isotropic) 
 treatment of cell esds is used for estimating esds involving l.s. planes. 
; 
  
loop_ 
 _geom_bond_atom_site_label_1 
 _geom_bond_atom_site_label_2 
 _geom_bond_distance 
 _geom_bond_site_symmetry_2 
 _geom_bond_publ_flag 
O1 C19 1.385(8) . ? 
O1 C16 1.391(9) . ? 
N1 C2 1.355(9) . ? 
N1 C5 1.373(10) . ? 
N2 C9 1.323(12) . ? 
N2 C6 1.536(12) . ? 
N3 C14 1.360(11) . ? 
N3 C11 1.380(10) . ? 
C1 C19 1.381(10) . ? 
C1 C2 1.439(11) . ? 
C1 C1A 1.497(10) . ? 
C2 C3 1.388(11) . ? 
C3 C4 1.360(10) . ? 
C4 C5 1.422(11) . ? 
C5 C6 1.381(12) . ? 
C6 C7 1.303(13) . ? 
C7 C8 1.496(15) . ? 
C8 C9 1.295(15) . ? 
C9 C10 1.385(15) . ? 
C10 C11 1.468(15) . ? 
C11 C12 1.405(12) . ? 
C12 C13 1.376(12) . ? 
C13 C14 1.414(11) . ? 
C14 C15 1.410(12) . ? 
C15 C16 1.395(11) . ? 
C15 C1B 1.480(12) . ? 
C16 C17 1.411(10) . ? 
C17 C18 1.353(10) . ? 
C18 C19 1.407(10) . ? 
O2 C35 1.384(8) . ? 
O2 C38 1.391(8) . ? 
N4 C24 1.362(11) . ? 
N4 C21 1.365(10) . ? 
N6 C33 1.357(10) . ? 
N6 C30 1.374(12) . ? 
C20 C38 1.402(10) . ? 
C20 C21 1.403(11) . ? 
C20 C1C 1.488(10) . ? 
C21 C22 1.444(11) . ? 
C22 C23 1.385(12) . ? 
C23 C24 1.392(13) . ? 
C24 C25 1.340(14) . ? 
C24 C25A 1.576(15) . ? 
C25 C26 1.362(16) . ? 
N5 C29 1.4200 . ? 
N5 C26 1.4200 . ? 
C26 C27 1.4200 . ? 
C27 C28 1.4200 . ? 
C28 C29 1.4200 . ? 
C29 C30 1.480(15) . ? 
N5A C25A 1.4200 . ? 
N5A C28A 1.4200 . ? 
C25A C26A 1.4200 . ? 
C26A C27A 1.4200 . ? 
C27A C28A 1.4200 . ? 
C28A C29A 1.382(16) . ? 
C29A C30 1.381(15) . ? 
C30 C31 1.406(14) . ? 
C31 C32 1.360(13) . ? 
C32 C33 1.434(11) . ? 
C33 C34 1.407(12) . ? 
C34 C35 1.410(10) . ? 
C34 C1D 1.479(11) . ? 
C35 C36 1.406(11) . ? 
C36 C37 1.354(10) . ? 
C37 C38 1.402(11) . ? 
C1A C6A 1.368(10) . ? 
C1A C2A 1.383(10) . ? 
C2A C3A 1.384(11) . ? 
C3A C4A 1.378(12) . ? 
C4A C5A 1.373(12) . ? 
C4A C7A 1.531(11) . ? 
C5A C6A 1.376(11) . ? 
C1B C6B 1.398(12) . ? 
C1B C2B 1.405(12) . ? 
C2B C3B 1.376(12) . ? 
C3B C4B 1.382(13) . ? 
C4B C5B 1.392(14) . ? 
C4B C7B 1.496(14) . ? 
C5B C6B 1.353(13) . ? 
C1C C2C 1.380(10) . ? 
C1C C6C 1.404(11) . ? 
C2C C3C 1.376(11) . ? 
C3C C4C 1.360(11) . ? 
C4C C5C 1.378(11) . ? 
C4C C7C 1.515(11) . ? 
C5C C6C 1.387(11) . ? 
C1D C6D 1.377(11) . ? 
C1D C2D 1.406(11) . ? 
C2D C3D 1.373(12) . ? 
C3D C4D 1.363(13) . ? 
C4D C5D 1.366(13) . ? 
C4D C7D 1.515(12) . ? 
C5D C6D 1.398(12) . ? 
C1S F3A 1.227(13) . ? 
C1S F1 1.289(11) . ? 
C1S F2 1.324(11) . ? 
C1S F2A 1.387(14) . ? 
C1S F3 1.398(11) . ? 
C1S F1A 1.401(12) . ? 
C1S C2S 1.508(12) . ? 
F1 F1A 0.780(17) . ? 
F1 F2A 1.438(18) . ? 
F2 F3A 1.20(2) . ? 
F2 F2A 1.27(2) . ? 
F3 F3A 0.99(2) . ? 
C2S O1S 1.218(9) . ? 
C2S O2S 1.220(10) . ? 
C3S F6A 1.276(12) . ? 
C3S F4 1.307(9) . ? 
C3S F4A 1.321(13) . ? 
C3S F6 1.353(9) . ? 
C3S F5 1.371(9) . ? 
C3S F5A 1.379(11) . ? 
C3S C4S 1.503(10) . ? 
F4 F5A 0.786(15) . ? 
F4 F4A 1.490(18) . ? 
F5 F6A 0.819(18) . ? 
F5 F5A 1.713(16) . ? 
F6 F4A 1.068(19) . ? 
F6 F6A 1.443(18) . ? 
C4S O3S 1.220(8) . ? 
C4S O4S 1.244(8) . ? 
C5S F8A 1.317(12) . ? 
C5S F7 1.322(10) . ? 
C5S F8 1.340(9) . ? 
C5S F9A 1.354(12) . ? 
C5S F9 1.363(10) . ? 
C5S F7A 1.378(12) . ? 
C5S C6S 1.492(11) . ? 
F7 F7A 0.719(17) . ? 
F7 F9A 1.582(17) . ? 
F8 F9A 0.918(17) . ? 
F8 F8A 1.624(18) . ? 
F9 F8A 0.63(2) . ? 
C6S O5S 1.184(9) . ? 
C6S O6S 1.234(9) . ? 
C7S F12 1.305(12) . ? 
C7S F10 1.330(12) . ? 
C7S F11 1.331(12) . ? 
C7S F11A 1.345(14) . ? 
C7S F12A 1.381(13) . ? 
C7S F10A 1.382(14) . ? 
C7S C8S 1.474(14) . ? 
F10 F11A 1.00(2) . ? 
F10 F12A 1.76(2) . ? 
F11 F10A 1.09(2) . ? 
F11 F11A 1.42(2) . ? 
F12 F12A 0.74(2) . ? 
F12 F10A 1.52(2) . ? 
C8S O7S 1.169(13) . ? 
C8S O8S 1.210(13) . ? 
  
loop_ 
 _geom_angle_atom_site_label_1 
 _geom_angle_atom_site_label_2 
 _geom_angle_atom_site_label_3 
 _geom_angle 
 _geom_angle_site_symmetry_1 
 _geom_angle_site_symmetry_3 
 _geom_angle_publ_flag 
C19 O1 C16 108.5(6) . . ? 
C2 N1 C5 110.4(7) . . ? 
C9 N2 C6 105.8(9) . . ? 
C14 N3 C11 111.3(8) . . ? 
C19 C1 C2 123.7(7) . . ? 
C19 C1 C1A 118.8(7) . . ? 
C2 C1 C1A 117.4(7) . . ? 
N1 C2 C3 106.4(7) . . ? 
N1 C2 C1 120.8(7) . . ? 
C3 C2 C1 132.8(7) . . ? 
C4 C3 C2 110.0(7) . . ? 
C3 C4 C5 106.5(7) . . ? 
N1 C5 C6 120.0(9) . . ? 
N1 C5 C4 106.4(7) . . ? 
C6 C5 C4 132.3(9) . . ? 
C7 C6 C5 141.6(11) . . ? 
C7 C6 N2 102.9(9) . . ? 
C5 C6 N2 112.5(8) . . ? 
C6 C7 C8 112.3(11) . . ? 
C9 C8 C7 103.0(10) . . ? 
C8 C9 N2 115.7(13) . . ? 
C8 C9 C10 129.2(13) . . ? 
N2 C9 C10 113.8(12) . . ? 
C9 C10 C11 127.8(11) . . ? 
N3 C11 C12 105.1(8) . . ? 
N3 C11 C10 125.4(9) . . ? 
C12 C11 C10 129.4(9) . . ? 
C13 C12 C11 109.6(8) . . ? 
C12 C13 C14 107.1(8) . . ? 
N3 C14 C15 125.1(8) . . ? 
N3 C14 C13 106.8(8) . . ? 
C15 C14 C13 128.0(9) . . ? 
C16 C15 C14 127.4(8) . . ? 
C16 C15 C1B 115.8(8) . . ? 
C14 C15 C1B 116.8(7) . . ? 
O1 C16 C15 122.8(8) . . ? 
O1 C16 C17 106.8(7) . . ? 
C15 C16 C17 130.4(8) . . ? 
C18 C17 C16 108.8(7) . . ? 
C17 C18 C19 108.4(7) . . ? 
C1 C19 O1 123.8(7) . . ? 
C1 C19 C18 128.7(7) . . ? 
O1 C19 C18 107.4(7) . . ? 
C35 O2 C38 107.8(6) . . ? 
C24 N4 C21 112.3(8) . . ? 
C33 N6 C30 111.5(8) . . ? 
C38 C20 C21 124.4(7) . . ? 
C38 C20 C1C 118.4(7) . . ? 
C21 C20 C1C 117.2(7) . . ? 
N4 C21 C20 124.4(7) . . ? 
N4 C21 C22 104.7(8) . . ? 
C20 C21 C22 130.9(8) . . ? 
C23 C22 C21 107.7(8) . . ? 
C22 C23 C24 108.4(8) . . ? 
C25 C24 N4 136.8(12) . . ? 
C25 C24 C23 116.3(11) . . ? 
N4 C24 C23 106.9(9) . . ? 
C25 C24 C25A 30.0(8) . . ? 
N4 C24 C25A 108.0(9) . . ? 
C23 C24 C25A 143.2(9) . . ? 
C24 C25 C26 117.5(16) . . ? 
C29 N5 C26 108.0 . . ? 
C25 C26 C27 135.1(14) . . ? 
C25 C26 N5 116.8(14) . . ? 
C27 C26 N5 108.0 . . ? 
C28 C27 C26 108.0 . . ? 
C27 C28 C29 108.0 . . ? 
C28 C29 N5 108.0 . . ? 
C28 C29 C30 133.3(14) . . ? 
N5 C29 C30 118.6(14) . . ? 
C25A N5A C28A 108.0 . . ? 
C26A C25A N5A 108.0 . . ? 
C26A C25A C24 135.9(9) . . ? 
N5A C25A C24 115.8(9) . . ? 
C27A C26A C25A 108.0 . . ? 
C26A C27A C28A 108.0 . . ? 
C29A C28A C27A 140.4(13) . . ? 
C29A C28A N5A 111.6(13) . . ? 
C27A C28A N5A 108.0 . . ? 
C30 C29A C28A 122.1(18) . . ? 
N6 C30 C29A 136.5(13) . . ? 
N6 C30 C31 105.8(9) . . ? 
C29A C30 C31 117.7(13) . . ? 
N6 C30 C29 104.4(12) . . ? 
C29A C30 C29 33.7(9) . . ? 
C31 C30 C29 146.9(12) . . ? 
C32 C31 C30 109.2(9) . . ? 
C31 C32 C33 107.7(8) . . ? 
N6 C33 C34 124.1(7) . . ? 
N6 C33 C32 105.9(8) . . ? 
C34 C33 C32 130.0(9) . . ? 
C33 C34 C35 124.8(8) . . ? 
C33 C34 C1D 117.2(7) . . ? 
C35 C34 C1D 118.1(7) . . ? 
O2 C35 C36 108.0(6) . . ? 
O2 C35 C34 122.9(7) . . ? 
C36 C35 C34 129.0(7) . . ? 
C37 C36 C35 107.8(7) . . ? 
C36 C37 C38 109.1(7) . . ? 
O2 C38 C20 122.2(7) . . ? 
O2 C38 C37 107.2(6) . . ? 
C20 C38 C37 130.5(7) . . ? 
C6A C1A C2A 117.7(7) . . ? 
C6A C1A C1 120.7(7) . . ? 
C2A C1A C1 121.6(7) . . ? 
C1A C2A C3A 121.4(8) . . ? 
C4A C3A C2A 119.7(8) . . ? 
C5A C4A C3A 119.0(8) . . ? 
C5A C4A C7A 120.2(8) . . ? 
C3A C4A C7A 120.8(8) . . ? 
C4A C5A C6A 120.5(8) . . ? 
C1A C6A C5A 121.6(8) . . ? 
C6B C1B C2B 115.6(9) . . ? 
C6B C1B C15 122.9(9) . . ? 
C2B C1B C15 121.3(8) . . ? 
C3B C2B C1B 122.1(8) . . ? 
C2B C3B C4B 120.4(10) . . ? 
C3B C4B C5B 118.1(9) . . ? 
C3B C4B C7B 120.9(11) . . ? 
C5B C4B C7B 121.0(10) . . ? 
C6B C5B C4B 121.1(9) . . ? 
C5B C6B C1B 122.5(10) . . ? 
C2C C1C C6C 116.1(7) . . ? 
C2C C1C C20 121.8(7) . . ? 
C6C C1C C20 122.1(7) . . ? 
C3C C2C C1C 122.0(8) . . ? 
C4C C3C C2C 121.4(8) . . ? 
C3C C4C C5C 118.6(8) . . ? 
C3C C4C C7C 121.6(8) . . ? 
C5C C4C C7C 119.7(9) . . ? 
C4C C5C C6C 120.2(8) . . ? 
C5C C6C C1C 121.6(8) . . ? 
C6D C1D C2D 118.4(8) . . ? 
C6D C1D C34 121.1(8) . . ? 
C2D C1D C34 120.5(7) . . ? 
C3D C2D C1D 119.1(8) . . ? 
C4D C3D C2D 123.1(10) . . ? 
C3D C4D C5D 117.8(9) . . ? 
C3D C4D C7D 121.3(10) . . ? 
C5D C4D C7D 120.9(10) . . ? 
C4D C5D C6D 121.2(9) . . ? 
C1D C6D C5D 120.3(9) . . ? 
F3A C1S F1 121.1(15) . . ? 
F3A C1S F2 56.2(10) . . ? 
F1 C1S F2 107.1(11) . . ? 
F3A C1S F2A 109.2(13) . . ? 
F1 C1S F2A 64.9(10) . . ? 
F2 C1S F2A 55.9(10) . . ? 
F3A C1S F3 43.9(10) . . ? 
F1 C1S F3 107.5(10) . . ? 
F2 C1S F3 99.8(9) . . ? 
F2A C1S F3 145.9(14) . . ? 
F3A C1S F1A 111.9(13) . . ? 
F1 C1S F1A 33.4(8) . . ? 
F2 C1S F1A 131.7(13) . . ? 
F2A C1S F1A 98.3(10) . . ? 
F3 C1S F1A 80.2(9) . . ? 
F3A C1S C2S 120.2(13) . . ? 
F1 C1S C2S 117.6(10) . . ? 
F2 C1S C2S 115.2(10) . . ? 
F2A C1S C2S 104.4(13) . . ? 
F3 C1S C2S 108.0(10) . . ? 
F1A C1S C2S 110.3(11) . . ? 
F1A F1 C1S 81.3(13) . . ? 
F1A F1 F2A 142.1(16) . . ? 
C1S F1 F2A 60.8(8) . . ? 
F3A F2 F2A 118.8(12) . . ? 
F3A F2 C1S 57.8(8) . . ? 
F2A F2 C1S 64.5(8) . . ? 
F3A F3 C1S 58.9(9) . . ? 
F1 F1A C1S 65.4(10) . . ? 
F2 F2A C1S 59.5(8) . . ? 
F2 F2A F1 101.5(11) . . ? 
C1S F2A F1 54.2(6) . . ? 
F3 F3A F2 142.7(14) . . ? 
F3 F3A C1S 77.2(12) . . ? 
F2 F3A C1S 66.0(9) . . ? 
O1S C2S O2S 127.3(9) . . ? 
O1S C2S C1S 113.1(9) . . ? 
O2S C2S C1S 119.6(9) . . ? 
F6A C3S F4 123.9(12) . . ? 
F6A C3S F4A 111.3(12) . . ? 
F4 C3S F4A 69.1(9) . . ? 
F6A C3S F6 66.5(10) . . ? 
F4 C3S F6 105.4(7) . . ? 
F4A C3S F6 47.1(9) . . ? 
F6A C3S F5 35.8(8) . . ? 
F4 C3S F5 104.9(7) . . ? 
F4A C3S F5 137.8(12) . . ? 
F6 C3S F5 100.4(7) . . ? 
F6A C3S F5A 107.5(11) . . ? 
F4 C3S F5A 33.9(7) . . ? 
F4A C3S F5A 102.7(10) . . ? 
F6 C3S F5A 129.8(10) . . ? 
F5 C3S F5A 77.1(8) . . ? 
F6A C3S C4S 114.8(11) . . ? 
F4 C3S C4S 117.5(8) . . ? 
F4A C3S C4S 108.7(12) . . ? 
F6 C3S C4S 116.1(7) . . ? 
F5 C3S C4S 110.5(7) . . ? 
F5A C3S C4S 111.2(9) . . ? 
F5A F4 C3S 78.1(11) . . ? 
F5A F4 F4A 133.3(14) . . ? 
C3S F4 F4A 55.9(7) . . ? 
F6A F5 C3S 65.8(10) . . ? 
F6A F5 F5A 110.4(12) . . ? 
C3S F5 F5A 51.7(5) . . ? 
F4A F6 C3S 64.9(8) . . ? 
F4A F6 F6A 116.5(10) . . ? 
C3S F6 F6A 54.2(6) . . ? 
F6 F4A C3S 68.1(9) . . ? 
F6 F4A F4 110.6(12) . . ? 
C3S F4A F4 55.0(6) . . ? 
F4 F5A C3S 68.0(10) . . ? 
F4 F5A F5 110.9(12) . . ? 
C3S F5A F5 51.3(5) . . ? 
F5 F6A C3S 78.4(12) . . ? 
F5 F6A F6 133.4(14) . . ? 
C3S F6A F6 59.3(7) . . ? 
O3S C4S O4S 129.9(7) . . ? 
O3S C4S C3S 116.4(7) . . ? 
O4S C4S C3S 113.7(7) . . ? 
F8A C5S F7 110.6(13) . . ? 
F8A C5S F8 75.4(10) . . ? 
F7 C5S F8 106.3(9) . . ? 
F8A C5S F9A 106.6(12) . . ? 
F7 C5S F9A 72.5(9) . . ? 
F8 C5S F9A 39.9(8) . . ? 
F8A C5S F9 27.1(9) . . ? 
F7 C5S F9 104.6(9) . . ? 
F8 C5S F9 102.4(9) . . ? 
F9A C5S F9 131.4(12) . . ? 
F8A C5S F7A 103.0(11) . . ? 
F7 C5S F7A 30.8(8) . . ? 
F8 C5S F7A 134.8(11) . . ? 
F9A C5S F7A 103.2(11) . . ? 
F9 C5S F7A 85.2(9) . . ? 
F8A C5S C6S 121.4(12) . . ? 
F7 C5S C6S 121.2(9) . . ? 
F8 C5S C6S 111.4(8) . . ? 
F9A C5S C6S 113.1(10) . . ? 
F9 C5S C6S 109.3(9) . . ? 
F7A C5S C6S 107.6(10) . . ? 
F7A F7 C5S 78.9(13) . . ? 
F7A F7 F9A 133.6(16) . . ? 
C5S F7 F9A 54.7(7) . . ? 
F9A F8 C5S 70.9(9) . . ? 
F9A F8 F8A 111.7(12) . . ? 
C5S F8 F8A 51.7(6) . . ? 
F8A F9 C5S 72.4(15) . . ? 
F7 F7A C5S 70.3(11) . . ? 
F9 F8A C5S 80.5(16) . . ? 
F9 F8A F8 133.3(19) . . ? 
C5S F8A F8 52.9(7) . . ? 
F8 F9A C5S 69.2(10) . . ? 
F8 F9A F7 114.1(12) . . ? 
C5S F9A F7 52.8(6) . . ? 
O5S C6S O6S 132.4(10) . . ? 
O5S C6S C5S 116.4(9) . . ? 
O6S C6S C5S 110.7(8) . . ? 
F12 C7S F10 110.1(12) . . ? 
F12 C7S F11 109.8(12) . . ? 
F10 C7S F11 106.9(11) . . ? 
F12 C7S F11A 114.9(16) . . ? 
F10 C7S F11A 43.9(11) . . ? 
F11 C7S F11A 64.2(12) . . ? 
F12 C7S F12A 31.7(9) . . ? 
F10 C7S F12A 80.7(11) . . ? 
F11 C7S F12A 132.1(14) . . ? 
F11A C7S F12A 101.5(13) . . ? 
F12 C7S F10A 68.8(11) . . ? 
F10 C7S F10A 143.8(15) . . ? 
F11 C7S F10A 47.2(10) . . ? 
F11A C7S F10A 102.0(13) . . ? 
F12A C7S F10A 99.4(12) . . ? 
F12 C7S C8S 113.1(13) . . ? 
F10 C7S C8S 105.7(13) . . ? 
F11 C7S C8S 110.9(12) . . ? 
F11A C7S C8S 130.1(16) . . ? 
F12A C7S C8S 112.0(13) . . ? 
F10A C7S C8S 107.6(15) . . ? 
F11A F10 C7S 68.9(10) . . ? 
F11A F10 F12A 96.1(14) . . ? 
C7S F10 F12A 50.9(7) . . ? 
F10A F11 C7S 68.9(10) . . ? 
F10A F11 F11A 114.6(14) . . ? 
C7S F11 F11A 58.4(8) . . ? 
F12A F12 C7S 79.8(14) . . ? 
F12A F12 F10A 135.2(17) . . ? 
C7S F12 F10A 58.0(8) . . ? 
F11 F10A C7S 64.0(10) . . ? 
F11 F10A F12 110.7(12) . . ? 
C7S F10A F12 53.2(7) . . ? 
F10 F11A C7S 67.2(11) . . ? 
F10 F11A F11 122.8(17) . . ? 
C7S F11A F11 57.4(8) . . ? 
F12 F12A C7S 68.5(12) . . ? 
F12 F12A F10 113.7(15) . . ? 
C7S F12A F10 48.4(7) . . ? 
O7S C8S O8S 118.0(19) . . ? 
O7S C8S C7S 117.3(18) . . ? 
O8S C8S C7S 122.8(17) . . ? 
  
_diffrn_measured_fraction_theta_max    1.000 
_diffrn_reflns_theta_full              22.50 
_diffrn_measured_fraction_theta_full   1.000 
_refine_diff_density_max    0.752 
_refine_diff_density_min   -0.508 
_refine_diff_density_rms    0.074 
  
